# Supplementary material for: Achieving policy impact on tobacco economics research: experiences and lessons learnt
Source: HighWire-hosted journal article supplement (doi:10.1136/tobaccocontrol-2021-056923), 2022-07-08
Supplement: tobaccocontrol-2021-056923supp001_data_supplement.pdf [file tobaccocontrol-2021-056923supp001_data_supplement.pdf]

| THINK TANK PARTNER                                                      | COUNTRY                       | WEBSITE                                         |
|-------------------------------------------------------------------------|-------------------------------|-------------------------------------------------|
| <b>Southeastern Europe</b>                                              |                               |                                                 |
| Development Solutions Associates (DSA)                                  | Albania                       | www.dsa.org.al                                  |
| <b>University of Banja Luka (UBL)</b>                                   | <b>Bosnia and Herzegovina</b> | <b>www.unibl.org</b>                            |
| Democracy Plus (D+)                                                     | Kosovo                        | www.dplus.org                                   |
| <b>Institute of Socio-Economic Analysis (ISEA)</b>                      | <b>Montenegro</b>             | <b>www.iseamne.com</b>                          |
| Analytica                                                               | North Macedonia               | www.analyticamk.org                             |
| <b>Institute of Economic Sciences (IES)</b>                             | <b>Serbia</b>                 | <b>www.ien.bg.ac.rs</b>                         |
| <i>University of Split</i>                                              | <i>Croatia</i>                | <i>www.unist.hr</i>                             |
| <i>Center for Political Courage</i>                                     | <i>Kosovo</i>                 | <i>www.cpc-ks.org</i>                           |
| <b>Asia</b>                                                             |                               |                                                 |
| Ark Foundation                                                          | Bangladesh                    | www.arkfoundationbd.org                         |
| <b>Center for Indonesia's Strategic Development Initiatives (CISDI)</b> | <b>Indonesia</b>              | <b>www.cisdi.org/id</b>                         |
| University of Gadjah Mada, Medical Faculty                              | Indonesia                     | www.fk.ugm.ac.id/en/school-of-medicine          |
| Pakistan Institute of Development Economics (PIDE)                      | Pakistan                      | www.pide.org.pk                                 |
| <b>Social Policy and Development Centre (SPDC)</b>                      | <b>Pakistan</b>               | <b>www.spdc.org.pk</b>                          |
| Development and Research Policies Center (DEPOCEN)                      | <b>Vietnam</b>                | <b>www.depocen.org</b>                          |
| <i>BRAC Institute of Governance and Development (BIGD)</i>              | <i>Bangladesh</i>             | <i>www.bigd.bracu.ac.bd</i>                     |
| <i>Institute for Health Economics (IHE)</i>                             | <i>Bangladesh</i>             | <i>www.ihe.ac.bd</i>                            |
| <i>Perkumpulan Prakarsa</i>                                             | <i>Indonesia</i>              | <i>www.theprakarsa.org</i>                      |
| <i>University of Indonesia, Tax Centre</i>                              | <i>Indonesia</i>              | <i>www.fia.ui.ac.id/en/tax-centre</i>           |
| <i>Institute of Public Policy Management (IPPM)</i>                     | <i>Vietnam</i>                | <i>www.neu.edu.vn</i>                           |
| <b>Latin America</b>                                                    |                               |                                                 |
| <b>Center for Distributive, Labor, and Social Studies (CEDLAS)</b>      | <b>Argentina</b>              | <b>www.cedlas.econo.unlp.edu.ar</b>             |
| <b>Universidade Católica de Brasília (UCB)</b>                          | <b>Brazil</b>                 | <b>www.ucb.catolica.edu.br</b>                  |
| <b>Centro de Investigación en Alimentación y Desarrollo (CIAD)</b>      | <b>Mexico</b>                 | <b>www.ciad.mx</b>                              |
| Centro de Investigación Económica y Presupuestaria (CIEP)               | Mexico                        | www.ciep.mx                                     |
| <b>Centro de Análisis y Difusión de la Economía Paraguaya (CADEP)</b>   | <b>Paraguay</b>               | <b>www.cadep.org.py</b>                         |
| <i>Instituto Torcuato Di Tella (ITDT)</i>                               | <i>Argentina</i>              | <i>www.utdt.edu</i>                             |
| <i>Universidad Nacional de San Martín (UNSAM)</i>                       | <i>Argentina</i>              | <i>www.unsam.edu.ar/escuelas/politica/ideas</i> |
| <i>Fundação Centro de Estudos do Comércio Exterior (FUNCEX)</i>         | <i>Brazil</i>                 | <i>www.funcex.org.br</i>                        |
| <i>Pontificia Universidad Católica del Ecuador (PUCE)</i>               | <i>Ecuador</i>                | <i>www.puce.edu.ec</i>                          |
| <i>Ethos</i>                                                            | <i>Mexico</i>                 | <i>www.ethos.org.mx</i>                         |
| <i>Instituto de Estudios Peruanos (IEP)</i>                             | <i>Peru</i>                   | <i>www.iep.org.pe</i>                           |
| <i>Red Sudamericana de Economía Aplicada</i>                            | <i>Uruguay</i>                | <i>www.redsudamericana.org</i>                  |

Think tanks in bold are featured in this supplement. Think tanks in italics are past partners.
